# Supplementary material for: Crystalline oligopyrene nanowires with multicolored emission
Source: Royal Society of Chemistry journal article supplement (doi:10.1039/b412638f), 2004-01-01
Supplement: b412638f.pdf [file b412638f.pdf]

## Crystalline oligopyrene nanowires with multicolored emission

Liangti Qu, and Gaoquan Shi

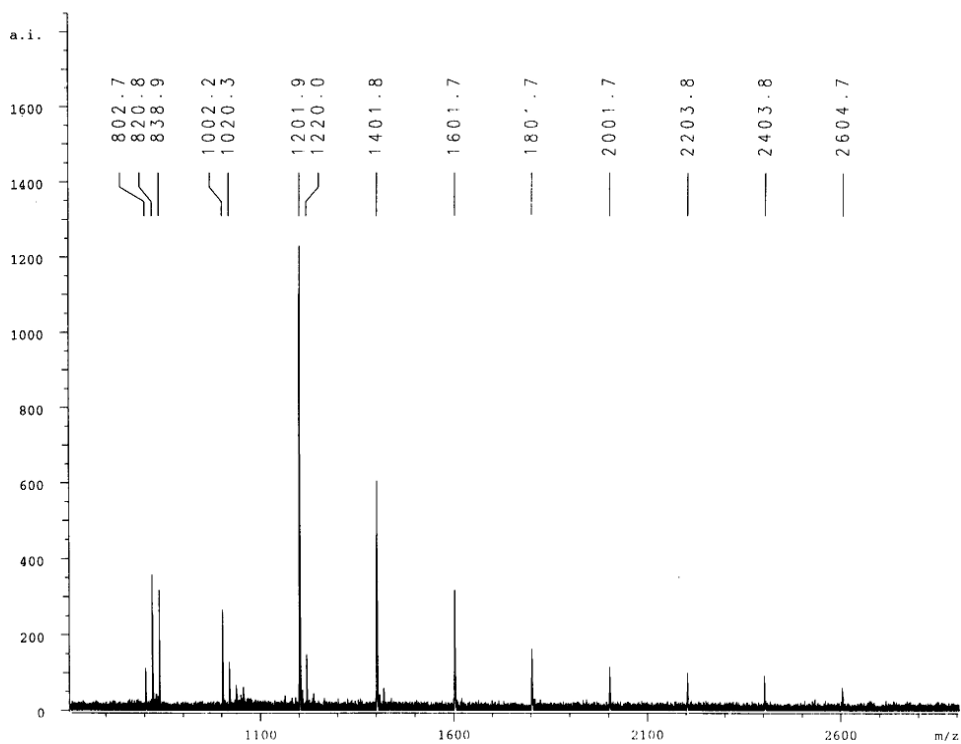

**Fig.** MALDI-TOF mass spectrum of polypyrene nanowires.
